# Supplementary material for: A genome-wide relay of signalling-responsive enhancers drives hematopoietic specification
Source: PubMed Central journal article supplement (PMC9845378; doi:10.1038/s41467-023-35910-9), 2023-01-17
Supplement: 41467_2023_35910_MOESM3_ESM.pdf [file 41467_2023_35910_MOESM3_ESM.pdf]

### **Descriptions of additional Supplementary Files**

**Supplementary Data 1** – Enhancer Positive ATAC sites

**Supplementary Data 2** – Enhancer Positive stage specific ATAC sites

**Supplementary Data 3** -All Stages Enhancer Positive ATAC site gene associations

**Supplementary Data 4** - VEGF Responsive Enhancers linked to VEGF Responsive Genes with GO terms and KEGG pathways

**Supplementary Data 5** - List of scRNAseq cell marker genes
